# Supplementary material for: Linking high GC content to the repair of double strand breaks in prokaryotic genomes
Source: PubMed Central journal article supplement (PMC6867656; doi:10.1371/journal.pgen.1008493), 2019-11-08
Supplement: pgen.1008493.s001.pdf [file pgen.1008493.s001.pdf]

S1 Table: Output of linear model relating GC content to environmental variables. The formal model was  $GC = \beta_0 + \beta_{Ku}Ku + \sum_i \beta_i \text{trait}_i + \epsilon$ , where GC is genomic GC content and Ku is a binary variable representing the presence/absence of Ku.

|                                 | $\beta$       | P-value               |
|---------------------------------|---------------|-----------------------|
| (Intercept)                     | 0.3267217383  | 2.44868893191596E-025 |
| Ecosystem Category: Terrestrial | 0.1101532163  | 3.38243170487937E-008 |
| Ecosystem Type: Soil            | 0.0333399451  | 0.1077906646          |
| Known Habitats: Soil            | -0.0331866659 | 0.0551188689          |
| Habitat: Terrestrial            | 0.1866541988  | 9.95695959696927E-025 |
| Nitrogen Fixation               | -0.0040711787 | 0.7635124534          |
| Nitrogen production             | -0.4157246148 | 3.66244214114883E-072 |
| Facultative Anaerobe            | 0.0073411402  | 0.6375719405          |
| Strict Aerobe                   | 0.0859143088  | 7.46077194429656E-007 |
| Strict Anaerobe                 | -0.0143781175 | 0.4307698204          |
| Sporulation                     | -0.1033310344 | 3.56417677006438E-016 |
| Hyperthermophilic               | -0.0834952183 | 0.0006640906          |
| Mesophilic                      | 0.1342814922  | 5.81638646775348E-009 |
| Thermophilic                    | 0.2526565354  | 1.32824551249747E-020 |
| Microaerophilic                 | -0.0631903302 | 3.51937747994195E-005 |
| Psychrophilic                   | -0.2429898729 | 7.89192914664017E-037 |
| Ku                              | 0.0126640175  | 0.0042992051          |
