# Supplementary material for: Linking high GC content to the repair of double strand breaks in prokaryotic genomes
Source: PubMed Central journal article supplement (PMC6867656; doi:10.1371/journal.pgen.1008493), 2019-11-08
Supplement: pgen.1008493.s002.pdf [file pgen.1008493.s002.pdf]

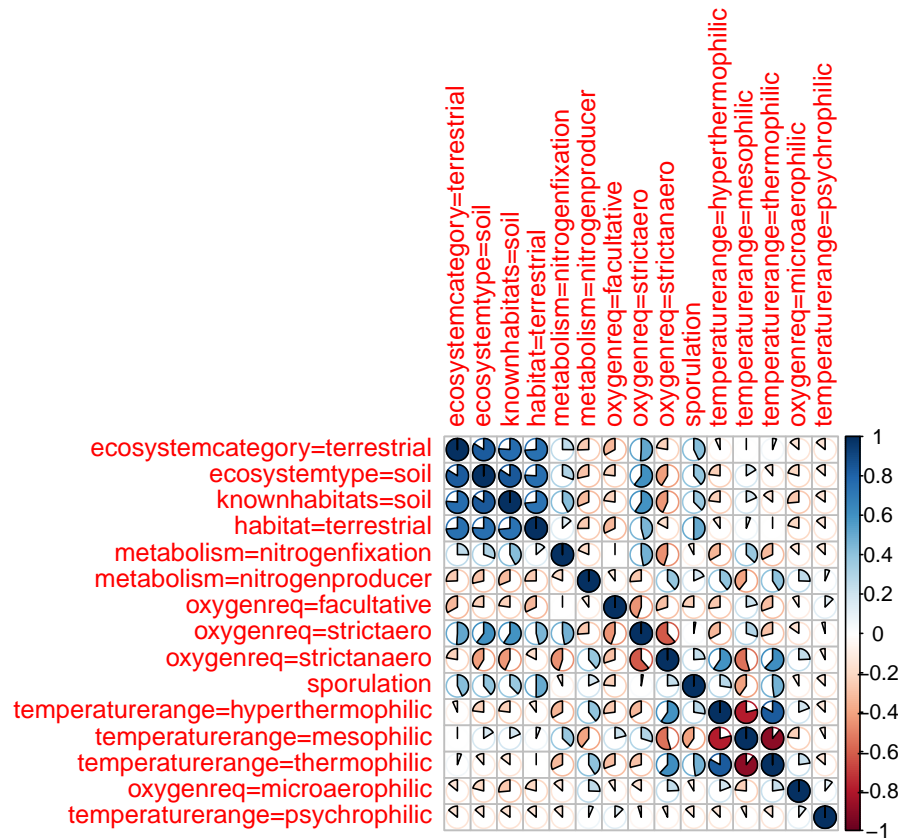

S1 Fig: The pairwise correlation between traits among species in the trait dataset. Note that some traits are highly correlated.
