# Supplementary material for: Linking high GC content to the repair of double strand breaks in prokaryotic genomes
Source: PubMed Central journal article supplement (PMC6867656; doi:10.1371/journal.pgen.1008493), 2019-11-08
Supplement: pgen.1008493.s003.pdf [file pgen.1008493.s003.pdf]

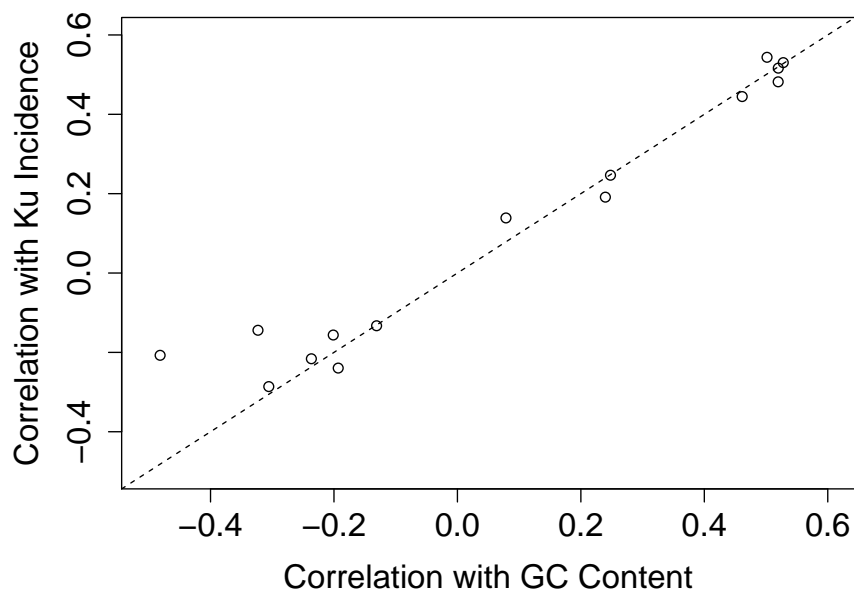

S2 Fig: The correlation of trait values for microbial species with their average genomic GC content is similar to the correlation of trait values with the presence/absence of Ku. Note that each point is an individual trait, as shown in Fig 1. The dashed diagonal line indicates the  $x = y$  line. For a direct analysis of the relationship between GC content and Ku incidence among organisms see Fig 2 and Table 1.
