# Supplementary material for: Linking high GC content to the repair of double strand breaks in prokaryotic genomes
Source: PubMed Central journal article supplement (PMC6867656; doi:10.1371/journal.pgen.1008493), 2019-11-08
Supplement: pgen.1008493.s006.pdf [file pgen.1008493.s006.pdf]

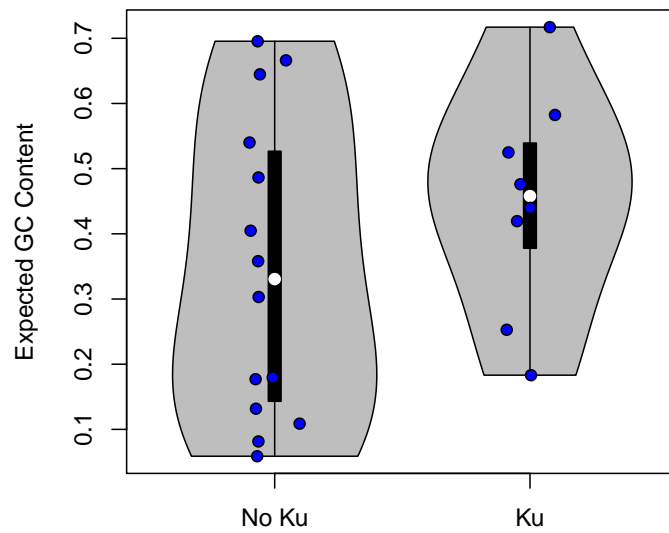

S5 Fig: Mutational bias does not appear to be associated with the NHEJ pathway. Organisms with the Ku protein did not differ significantly in their GC $\leftrightarrow$ AT mutational biases from those without the Ku protein (t-test,  $p > 0.34$ ). Estimates of mutational bias were obtained from Long et al. [1].
