# Supplementary material for: Linking high GC content to the repair of double strand breaks in prokaryotic genomes
Source: PubMed Central journal article supplement (PMC6867656; doi:10.1371/journal.pgen.1008493), 2019-11-08
Supplement: pgen.1008493.s012.pdf [file pgen.1008493.s012.pdf]

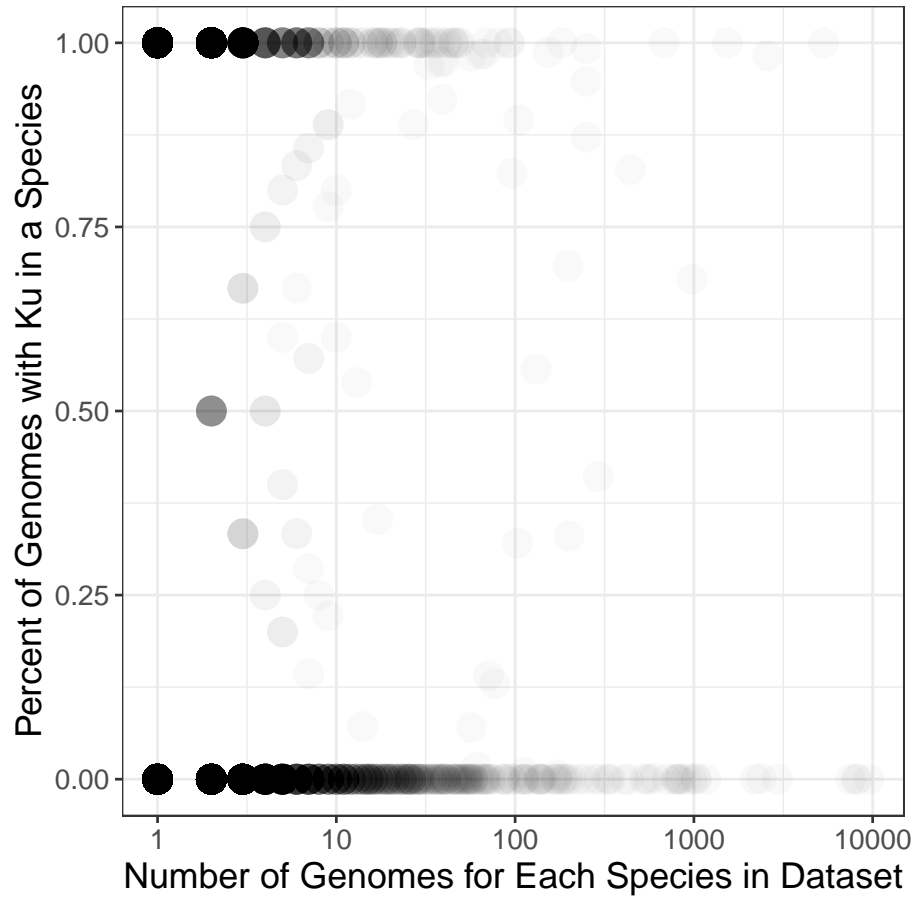

S11 Fig: Most species in RefSeq tend to always encode or always lack Ku on their genomes. Shown is the proportion of genomes within a species that have Ku (all RefSeq assemblies) plotted against the total number of assemblies in RefSeq for that species.
